# Supplementary material
Source: PubMed Central journal article supplement (PMC3096747)
Supplement: NIHMS287477-supplement-1_si_001.pdf [file NIHMS287477-supplement-1_si_001.pdf]

# Supporting Information

## Low-Spin Heme $b_3$ in the Catalytic Center of Nitric Oxide Reductase from *Pseudomonas nautica*<sup>†</sup>

Cristina G. Timóteo,<sup>‡</sup> Alice S. Pereira,<sup>‡,\*</sup> Carlos E. Martins,<sup>‡</sup> Sunil G. Naik,<sup>§</sup> Américo G. Duarte,<sup>‡</sup> José  
J. G. Moura,<sup>‡</sup> Pedro Tavares,<sup>‡</sup> Boi Hanh Huynh<sup>§</sup> and Isabel Moura<sup>‡,\*</sup>

Contributions from Requite, Centro de Química Fina e Biotecnologia, Departamento de Química,  
Faculdade de Ciências e Tecnologia, Universidade Nova de Lisboa, Quinta da Torre, 2829-516  
Caparica, Portugal, and Department of Physics, Emory University, Atlanta, GA 30322, USA

<sup>†</sup> This work was supported in part by funds from PDTC/QUI/64638/2006 grant (I.M.),  
SFRH/BPD/14863/2003 (C.G.T.), SFRH/BD/17840/2004 (C.E.M.), SFRH/BD/39009/2007 (A.G.D.)  
and National Institutes of Health grant GM 47295 (B.H.H.)

<sup>‡</sup> Universidade Nova de Lisboa

<sup>§</sup> Emory University

\* Authors of correspondence: [alice.pereira@dq.fct.unl.pt](mailto:alice.pereira@dq.fct.unl.pt); isa@dq.fct.unl.pt; Phone: 351-212948345;  
Fax: 351-212948550; Departamento de Química, Faculdade de Ciências e Tecnologia, UNL, 2829-  
516 Caparica. PORTUGAL.

(A)

atggccgagcgcctttacccaaaagcatggccaggaacatatatctggggggaagtgccttc  
M A E R F T K S M A R N I Y L G G S A F  
ttcgtcctgctggttcctggccctgacttttgacactcagctgcgtgctatgcccgagcgg  
F V L L F L A L T F D T Q L R A M P E R  
gataaccgcgacgagctcaccgaacaggtggtgcgcgccaaacatctgtgggaagagaac  
D N R D E L T E Q V V R G K H L W E E N  
aactgtgtcggttgtcattccatcaggggccaagggcgttacttcgctcccgaactggcc  
N C V G C H S I R G E G A Y F A P E L A  
aacgtggttgaccgccgtggcggcggtgatactgaggtcttcaaggcatacatgaaagcc  
N V F D R R G G G D T E V F K A Y M K A  
tggatgaacgccatgccacgaatattccgggcccggccagatgccggatttcaatctg  
W M N A M P T N I P G R R Q M P D F N L  
agtgattccgaggtcgaagacctggcgcgtttcctggagtggacatccaagatcgacgac  
S D S E V E D L A A F L E W T S K I D D  
aacggttgccaccaacatcgaggggtaa  
N G W P P N I E G -

**(B)**

atgaaatacgaatctcaaagggctcgccatgcctacttcatctttgcctgattctgttt  
M K Y E S Q R V A M P Y F I F A L I L F  
gccggccagattgtgttcggcctgattctgggtctccagtagcttgcggtgatttcctg  
A G Q I V F G L I L G L Q Y V V G D F L  
tttccggaaattcctttcaacggttgcgcggatgggtgcataccaacctgctgattgtctgg  
F P E I P F N V A R M V H T N L L I V W  
ctgctgttcggcttcatgggcccactactacatgggtccggagaagaagcccagaccgaa  
L L F G F M G A T Y Y M V P E E A Q T E  
ctgcacagccccctgctggcgtggattctgttctgggtggtcgcggcagctggcacgctg  
L H S P L L A W I L F W V F A A A G T L  
accatcctgggctacctgtttgtggactacgccaccttggcagaagtccatgaacaag  
T I L G Y L F V D Y A T L A E V T M N K  
ttgctaccaccatgggcccggagttcctggagcaaccacgataaccaagatcggatc  
L L P T M G R E F L E Q P T I T K I G I  
gccgtggctcgtgggtggcgttccctctataacatcgccatgaccgcgctgaaaggccgcaag  
A V V V V A F L Y N I A M T A L K G R K  
accgtggtaacatcgtactgatcaccggcctggtaggcctggccgtattgtggctgttc  
T V V N I V L I T G L V G L A V L W L F  
tccttctacaacccccggcaacctggccaccgacaagtacttctgggtgggtttgtgggtccac  
S F Y N P G N L A T D K Y F W W F V V H  
ctgtgggtagaaggcgtgtgggaactgatcatgggtgccattctggcctatgtgttgatc  
L W V E G V W E L I M G A I L A Y V L I  
aagctcacagggtgtagaccgcgaagtaatcgagaagtggctgtacgtgatcatcgccatg  
K L T G V D R E V I E K W L Y V I I A M  
gcgctgattaccggcatcatcggtaccggcaccacttcttctggatcggggccgcccagag  
A L I T G I I G T G G H H F F W I G P P E  
tactggctctggctgggttctgtgttctctgcactggaaccgcttccggttcttcatgatg  
Y W L W L G S V F S A L E P L P F F M M  
gtggctcttcgccttcaacatgatcaaccgtcgccgcccgaaccacccgaacaaggccgcg  
V V F A F N M I N R R R R N H P N K A A  
atgctgtgggcatgggtacaaccgtcatggcattcctgggcgctggcgtgtggggcttc  
M L W A M G T T V M A F L G A G V W G F  
ctgcacaccctggctccgggtgaactggtagccatggtagccagattaccgcagcccac  
L H T L A P V N W Y T H G S Q I T A A H  
ggccacatggccttctatggcgcctacgtaatgattgtactgaccatcatttctctacgcc  
G H M A F Y G A Y V M I V L T I I S Y A  
atgccaatcatgcgcggtcgccccctacggcaacagcaataccgctcagattgtggaaatg  
M P I M R G R P Y G N S N T A Q I V E M  
tggggcttctggctcatgaccatctccatgggtgttcatcaccctgttctgaccgctgcc  
W G F W L M T I S M V F I T L F L T A A  
ggcgtcctgcagggttgggtgcagcgtattccggaaagcgggtgaagcgtgtccttcatg  
G V L Q V W L Q R I P E S G E A L S F M  
gcaggccaggatcagatcgccctgttctactggatgagatttgcgcgggtgccttcttc  
A G Q D Q I A L F Y W M R F V A G A F F  
atggccggcctgggtgtacttccggtagcttctttatcaagggcgaagcagcccggct  
M A G L V V Y F G S F F I K G E A S P A  
gaggaagtccgggggctgccacggcagacgcctga  
E E V R G P A T A D A -

**Figure S1.** DNA sequence of the genes coding the small (A) and large (B) subunits of *Ps. nautica* cNOR and the corresponding deduced amino-acid sequence.

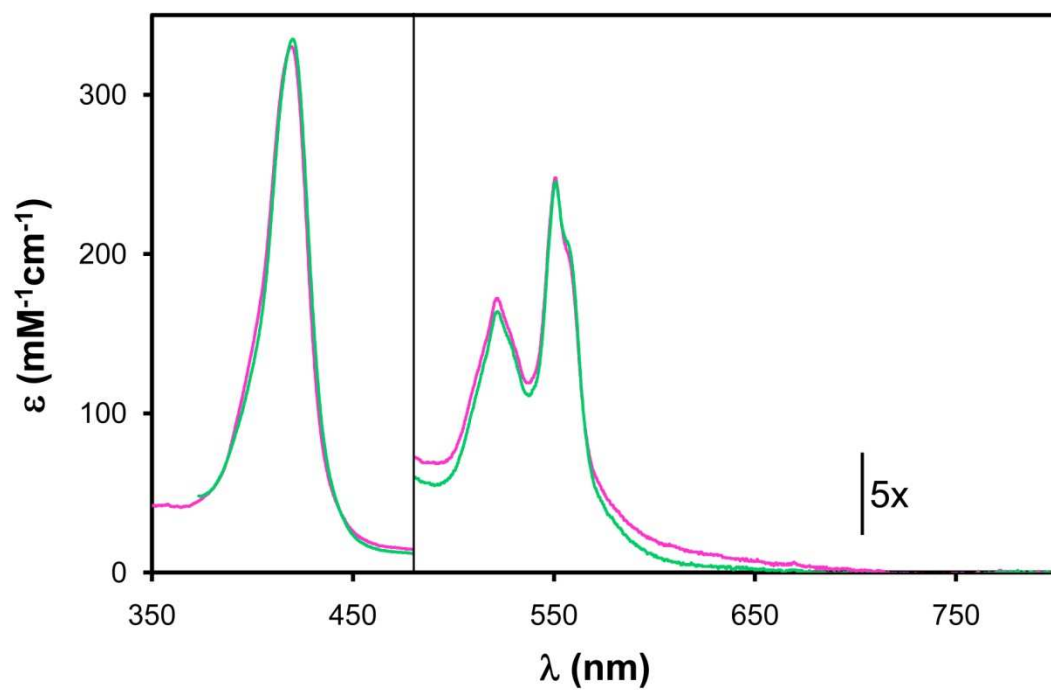

**Figure S2.** Comparison of the UV/visible spectra of the ascorbate plus PMS-reduced (pink) and dithionite-reduced (green) *Ps. nautica* cNOR in 100 mM KPBS, pH 7, 0.02% DDM, 0.01% PE.
